# Supplementary material
Source: publisher figshare collection journal article supplement (https://acs.figshare.com/ndownloader/files/4690777)
Supplement: Supplementary file 1 [file 4690777]

### Change in UV absorption and FT-IR spectrum of P2 film.

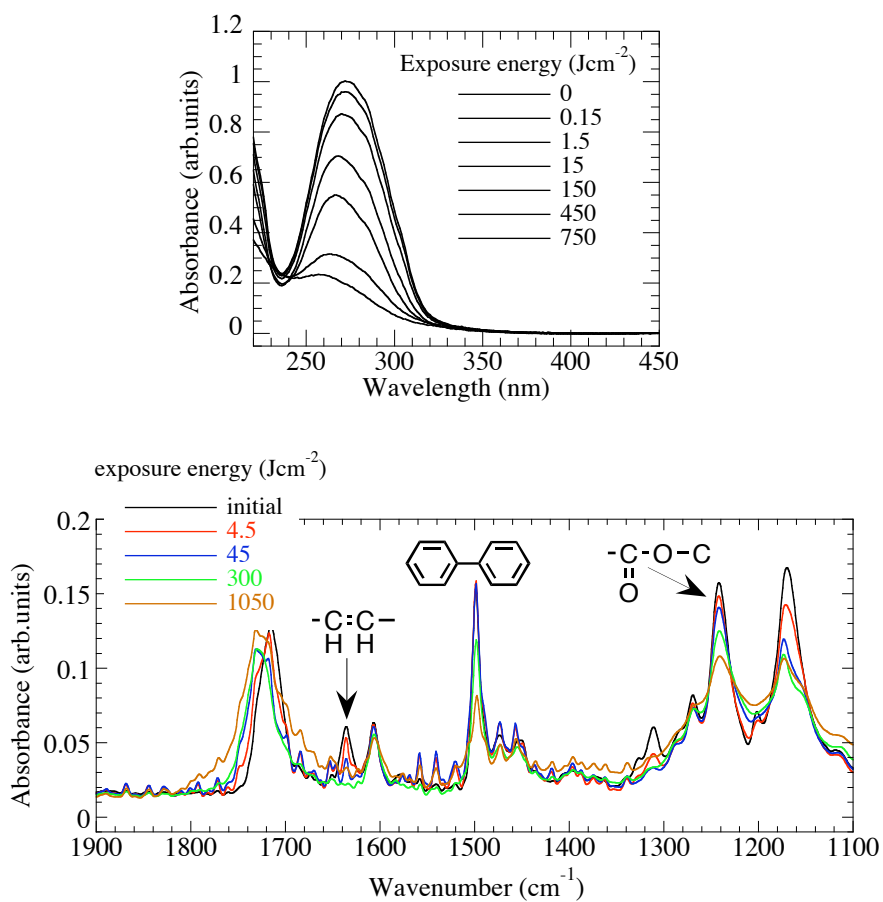

When the exposure energy is until 50 Jcm<sup>-2</sup>, decrease at 1635 cm<sup>-2</sup> (double bond in cinnamate) is observed. For the further exposing, decreases at 1500 cm<sup>-2</sup> (biphenyl groups), and at 1240 cm<sup>-2</sup> (ester C-O-C bond) are detected, which correspond to the photodegradation.

Other polymer films exhibited similar results.
